# Supplementary material for: Conversion to below-elbow cast after 3 weeks is safe for diaphyseal both-bone forearm fractures in children: A multicenter randomized controlled trial involving 127 children
Source: PubMed Central journal article supplement — Acta Orthop. 2013 Oct;84(5):489–94. doi: 10.3109/17453674.2013.850010 (PMC3822135; doi:10.3109/17453674.2013.850010), 2013-10
Supplement: ORT-84-489-s5997.pdf [file ORT-84-489-s5997.pdf]

## Supplementary article data

# Conversion to below-elbow cast after 3 weeks is safe for diaphyseal both-bone forearm fractures in children

## A multicenter randomized controlled trial involving 127 children

Joost W Colaris<sup>1</sup>, Jan Hein Allema<sup>2</sup>, L Ulas Biter<sup>3</sup>, Max Reijman<sup>1</sup>, Cees P van de Ven<sup>1</sup>, Mark R de Vries<sup>4</sup>, Rolf M Bloem<sup>4</sup>, Albert J H Kerver<sup>3</sup>, and Jan A N Verhaar<sup>1</sup>

<sup>1</sup>Department of Orthopaedic Surgery, Erasmus Medical Center, Rotterdam; <sup>2</sup>Department of Surgery, HAGA Hospital, the Hague; <sup>3</sup>Department of Surgery, Sint Franciscus Hospital, Rotterdam; <sup>4</sup>Department of Surgery, Reinier de Graaf Hospital, Delft, the Netherlands.

Correspondence: j.colaris@erasmusmc.nl

Submitted 12-11-04. Accepted 13-07-04

Table 4. Data on secondary outcomes. Unless otherwise stated, values are mean (SD)

|                                                                      | AEC       | AEC + BEC |
|----------------------------------------------------------------------|-----------|-----------|
| VAS cast comfort <sup>a</sup>                                        | 4.4 (2.3) | 8.1 (1.8) |
| VAS cosmetics fractured arm by parents                               | 7.8 (2.2) | 8.6 (1.9) |
| VAS cosmetics fractured arm by orthopedic surgeon                    | 8.0 (2.0) | 8.9 (1.6) |
| Total ABILHAND score at final clinical examination                   | 40 (7.5)  | 41 (5.3)  |
| Total complications, %                                               | 52        | 39        |
| Secondary dislocation, %                                             | 37        | 31        |
| Secondary reduction, %                                               | 11        | 3         |
| Days in cast                                                         | 44 (8)    | 44 (5)    |
| Days until first clinical examination                                | 79 (26)   | 78 (26)   |
| Days until final clinical examination                                | 211 (43)  | 208 (38)  |
| Referral to physiotherapy, %                                         | 59        | 38        |
| Number of visits to physiotherapy                                    | 4.1 (5.8) | 2.2 (4.0) |
| Limitation of wrist flexion-extension of the fractured arm (degrees) | 3.4 (6.9) | 1.6 (3.8) |
| Limitation of elbow flexion-extension of the fractured arm (degrees) | 1.2 (4.4) | 0.5 (1.9) |

<sup>a</sup> Significant difference ( $p < 0.001$ ) after correcting for imbalance of baseline variables, namely age, dominant arm, and type of fracture radius.

Table 6. Radiographic outcomes

|                                     | AEC     |                 |                 |       | AEC + BEC |                 |                 |       |
|-------------------------------------|---------|-----------------|-----------------|-------|-----------|-----------------|-----------------|-------|
|                                     | Trauma  | After reduction | Removal of cast | Final | Trauma    | After reduction | Removal of cast | Final |
| Angulation                          |         |                 |                 |       |           |                 |                 |       |
| AP ulna                             | 13 (9)  | 3 (3)           | 4 (3)           | 6 (4) | 13 (12)   | 4 (4)           | 6 (4)           | 6 (4) |
| AP radius                           | 14 (8)  | 5 (3)           | 6 (4)           | 6 (4) | 12 (10)   | 6 (3)           | 7 (5)           | 7 (5) |
| Lateral ulna                        | 25 (18) | 6 (5)           | 5 (5)           | 4 (4) | 26 (16)   | 6 (4)           | 7 (5)           | 6 (4) |
| Lateral radius                      | 28 (17) | 9 (5)           | 10 (6)          | 8 (5) | 28 (16)   | 7 (5)           | 9 (5)           | 8 (5) |
| Translation                         |         |                 |                 |       |           |                 |                 |       |
| AP ulna                             | 7 (20)  | 3 (8)           | a               | a     | 3 (9)     | 3 (9)           | a               | a     |
| AP radius                           | 3 (8)   | 5 (11)          | a               | a     | 11 (21)   | 11 (19)         | a               | a     |
| Lateral ulna                        | 10 (27) | 7 (17)          | a               | a     | 9 (23)    | 11 (24)         | a               | a     |
| Lateral radius                      | 9 (25)  | 4 (10)          | a               | a     | 9 (26)    | 13 (23)         | a               | a     |
| Shortening of radius and/or ulna, % | 14      |                 |                 |       | 14        |                 |                 |       |
| Rotation of radius and/or ulna, %   | 6.2     |                 |                 |       | 1.7       |                 |                 |       |

Angulation: radioulnar angulation (AP ulna, AP radius) and sagittal angulation (lateral ulna, lateral radius) presented in degrees as mean (SD). Translation: radioulnar translation (AP ulna, AP radius) and sagittal translation (lateral ulna, lateral radius) presented in percentage of the width of ulna or radius as mean (SD).

<sup>a</sup> Translation not relevant because of formation of callus.

No significant differences were found between the AEC group and the AEC + BEC group.
